# Supplementary figures and images for: Anemia and incidence of dementia in patients with new-onset type 2 diabetes: a nationwide population-based cohort study
Source: PubMed Central journal article supplement — BMJ Open Diabetes Res Care. 2020 Aug 2;8(1):e001289. doi: 10.1136/bmjdrc-2020-001289 (PMC7398094; doi:10.1136/bmjdrc-2020-001289), 2020-08-02

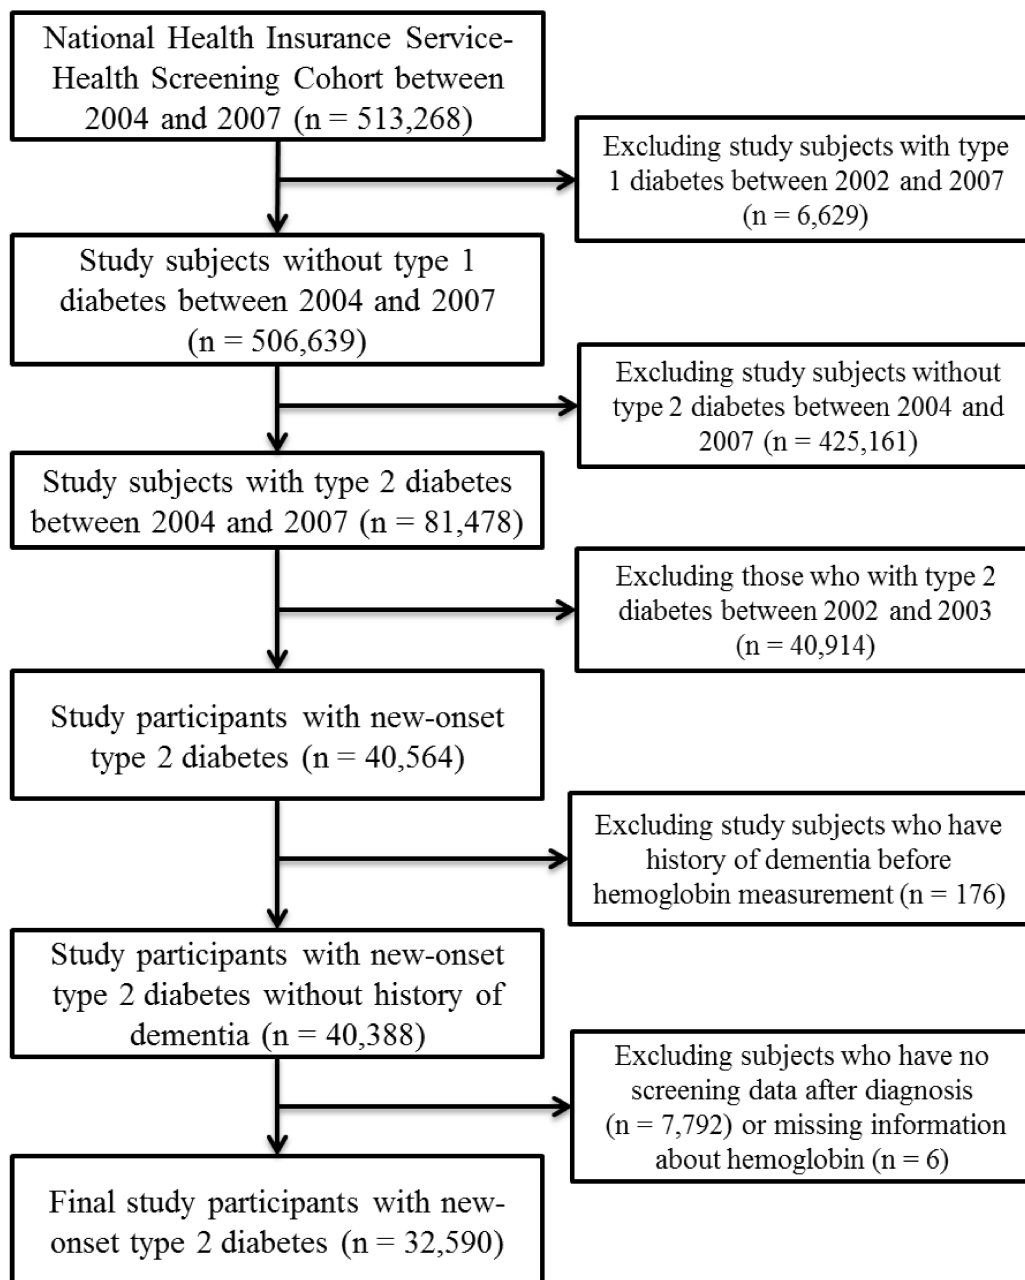

Supplementary Figure 1. Flow chart of the study participants

Supplement: bmjdrc-2020-001289supp001.pdf [file bmjdrc-2020-001289supp001.pdf]
